# Supplementary material for: pERK/pAkt phenotyping in circulating tumor cells as a biomarker for sorafenib efficacy in patients with advanced hepatocellular carcinoma
Source: PubMed Central journal article supplement (PMC4823061; doi:10.18632/oncotarget.6104), 2015-10-26
Supplement: oncotarget-07-2646-s001.pdf [file oncotarget-07-2646-s001.pdf]

## SUPPLEMENTARY TABLES

**Supplementary Table S1: pERK/pAkt phenotyping in tumor tissues and circulating tumor cells (CTCs) from patients with hepatocellular carcinoma**

| Phenotype                            | Tumor tissues |      | CTCs     |      |
|--------------------------------------|---------------|------|----------|------|
|                                      | <i>n</i>      | %    | <i>n</i> | %    |
| Total                                | 32            | 100  | 101      | 100  |
| pERK <sup>+</sup> /pAkt <sup>+</sup> | 4             | 12.5 | 16       | 15.9 |
| pERK <sup>+</sup> /pAkt <sup>-</sup> | 3             | 9.4  | 9        | 8.9  |
| pERK <sup>-</sup> /pAkt <sup>+</sup> | 23            | 71.9 | 65       | 64.4 |
| pERK <sup>-</sup> /pAkt <sup>-</sup> | 2             | 6.3  | 11       | 10.9 |
| pERK <sup>+</sup>                    | 7             | 21.9 | 25       | 24.8 |
| pAkt <sup>+</sup>                    | 27            | 84.4 | 81       | 80.2 |

**Supplementary Table S2: CTCs counts pre- and post-treatment with sorafenib in each subset of HCC patients.**

| Patient classification                                | CTC counts    |                | Decline (%) |
|-------------------------------------------------------|---------------|----------------|-------------|
|                                                       | Pre-treatment | Post-treatment |             |
| pERK <sup>+</sup> /pAkt <sup>+</sup> ( <i>n</i> = 11) | 64 ± 34       | 39 ± 21        | 38.3 ± 19.1 |
| pERK <sup>+</sup> /pAkt <sup>-</sup> ( <i>n</i> = 7)  | 52 ± 6        | 21 ± 11        | 60.6 ± 17.9 |
| pERK <sup>-</sup> /pAkt <sup>+</sup> ( <i>n</i> = 33) | 58 ± 14       | 48 ± 14        | 18.3 ± 6.3  |
| pERK <sup>-</sup> /pAkt <sup>-</sup> ( <i>n</i> = 8)  | 40 ± 16       | 34 ± 15        | 17.1 ± 7.3  |

**Supplementary Table S3: CTC subtypes and progression-free survivals (PFS) in 15 patients with pERK<sup>+</sup>/pAkt<sup>-</sup> CTCs**

| Patient No. | CTCs (n)                             |                                      |                                      |                                      | Total | (pERK <sup>+</sup> /pAkt <sup>-</sup> ) CTCs/total | PFS (mo) |
|-------------|--------------------------------------|--------------------------------------|--------------------------------------|--------------------------------------|-------|----------------------------------------------------|----------|
|             | pERK <sup>+</sup> /pAkt <sup>+</sup> | pERK <sup>+</sup> /pAkt <sup>-</sup> | pERK <sup>-</sup> /pAkt <sup>+</sup> | pERK <sup>-</sup> /pAkt <sup>-</sup> |       |                                                    |          |
| 1           | 27                                   | 3                                    | 8                                    | 0                                    | 38    | 0.08                                               | 1.1      |
| 2           | 12                                   | 8                                    | 23                                   | 0                                    | 43    | 0.19                                               | 1.5      |
| 3           | 0                                    | 15                                   | 0                                    | 38                                   | 53    | 0.28                                               | 2.8      |
| 4           | 58                                   | 52                                   | 19                                   | 8                                    | 137   | 0.38                                               | 1.7      |
| 5           | 69                                   | 45                                   | 0                                    | 0                                    | 114   | 0.39                                               | 2.2      |
| 6           | 0                                    | 32                                   | 23                                   | 14                                   | 69    | 0.46                                               | 6.1      |
| 7           | 0                                    | 27                                   | 0                                    | 24                                   | 51    | 0.53                                               | 7.6      |
| 8           | 20                                   | 31                                   | 0                                    | 5                                    | 56    | 0.55                                               | 6.5      |
| 9           | 0                                    | 37                                   | 10                                   | 17                                   | 64    | 0.58                                               | 8.4      |
| 10          | 0                                    | 37                                   | 0                                    | 24                                   | 61    | 0.61                                               | 6.9      |
| 11          | 0                                    | 43                                   | 0                                    | 13                                   | 56    | 0.77                                               | 9.9      |
| 12          | 0                                    | 32                                   | 2                                    | 0                                    | 34    | 0.94                                               | 10.7     |
| 13          | 0                                    | 43                                   | 0                                    | 0                                    | 43    | 1.00                                               | 12.4     |
| 14          | 0                                    | 48                                   | 0                                    | 0                                    | 48    | 1.00                                               | 14.7     |
| 15          | 0                                    | 50                                   | 0                                    | 0                                    | 50    | 1.00                                               | 13.1     |

**Supplementary Table S4: Clinical characteristics of 109 patients with hepatocellular carcinoma**

| Characteristic         | <i>n</i>    | %    |
|------------------------|-------------|------|
| Sex                    |             |      |
| Male                   | 84          | 77.1 |
| Female                 | 25          | 22.9 |
| Age, y                 | 57.5 ± 13.1 |      |
| > 50                   | 73          | 67.0 |
| ≤ 50                   | 36          | 33.0 |
| Etiology               |             |      |
| HBV only               | 84          | 77.1 |
| HCV only               | 4           | 3.7  |
| HBV & HCV              | 5           | 4.6  |
| Non-HBV, Non-HCV       | 16          | 14.7 |
| Maximum tumor size, cm |             |      |
| > 3                    | 66          | 60.6 |
| ≤ 3                    | 43          | 39.4 |
| Number of tumors       |             |      |
| Single                 | 10          | 9.2  |
| Multiple               | 99          | 90.8 |
| AFP level, ng/mL       |             |      |
| < 400                  | 70          | 64.2 |
| ≥ 400                  | 39          | 35.8 |
| ECOG PS                |             |      |
| 0                      | 34          | 31.2 |
| 1                      | 42          | 38.5 |
| 2                      | 33          | 30.3 |
| Child-Pugh class       |             |      |
| A                      | 77          | 70.6 |
| B                      | 32          | 29.4 |
| Portal vein thrombus   |             |      |
| Positive               | 78          | 71.6 |
| Negative               | 31          | 28.4 |
| TNM staging            |             |      |
| III                    | 84          | 77.1 |
| IV                     | 25          | 22.9 |
| BCLC stage             |             |      |
| B (intermediate)       | 31          | 28.4 |
| C (advanced)           | 78          | 71.6 |

(Continued)

| Characteristic          | <i>n</i> | %    |
|-------------------------|----------|------|
| Previous therapy        |          |      |
| Surgical resection      | 32       | 29.4 |
| TACE                    | 21       | 19.3 |
| Radiofrequency ablation | 6        | 5.5  |
| None                    | 50       | 45.8 |

Abbreviations: AFP, alpha-fetoprotein; HBV, hepatitis B virus; HCV, hepatitis C virus; PS, performance status; TACE, transcatheter arterial chemoembolization; TNM, tumor-node-metastasis stage.
